# Supplementary material
Source: PubMed Central journal article supplement (PMC5141384)
Supplement: NIHMS832784-supplement-supplemental.pdf [file NIHMS832784-supplement-supplemental.pdf]

## **Supplementary Material**

Anhedonia is associated with reduced incentive cue-related activation in the basal ganglia

Yu Sun Chung<sup>1</sup> & Deanna M. Barch<sup>2</sup>

<sup>1</sup> Department of Psychology, Northwestern University, U.S.A.

<sup>2</sup> Department of Psychology, Psychiatry, and Radiology, Washington University in St. Louis, USA

Supplementary Fig 1.  
A.

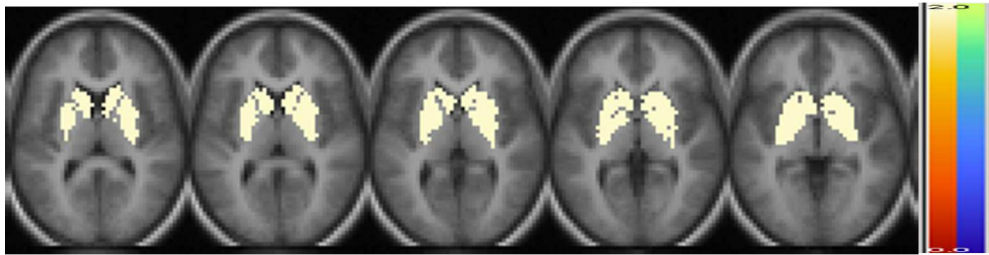

B.

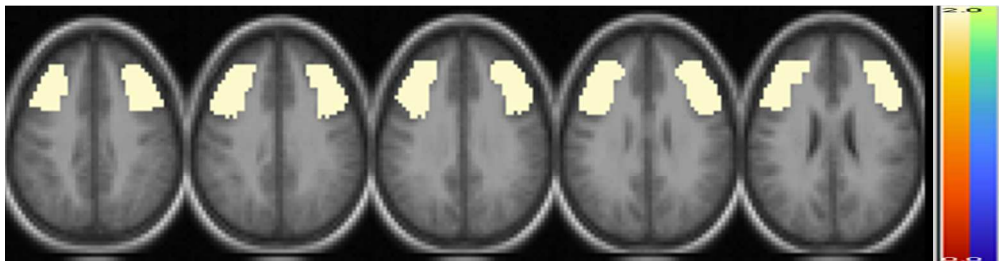

Supplementary Fig 2.

— BCXT — RCXT — RC

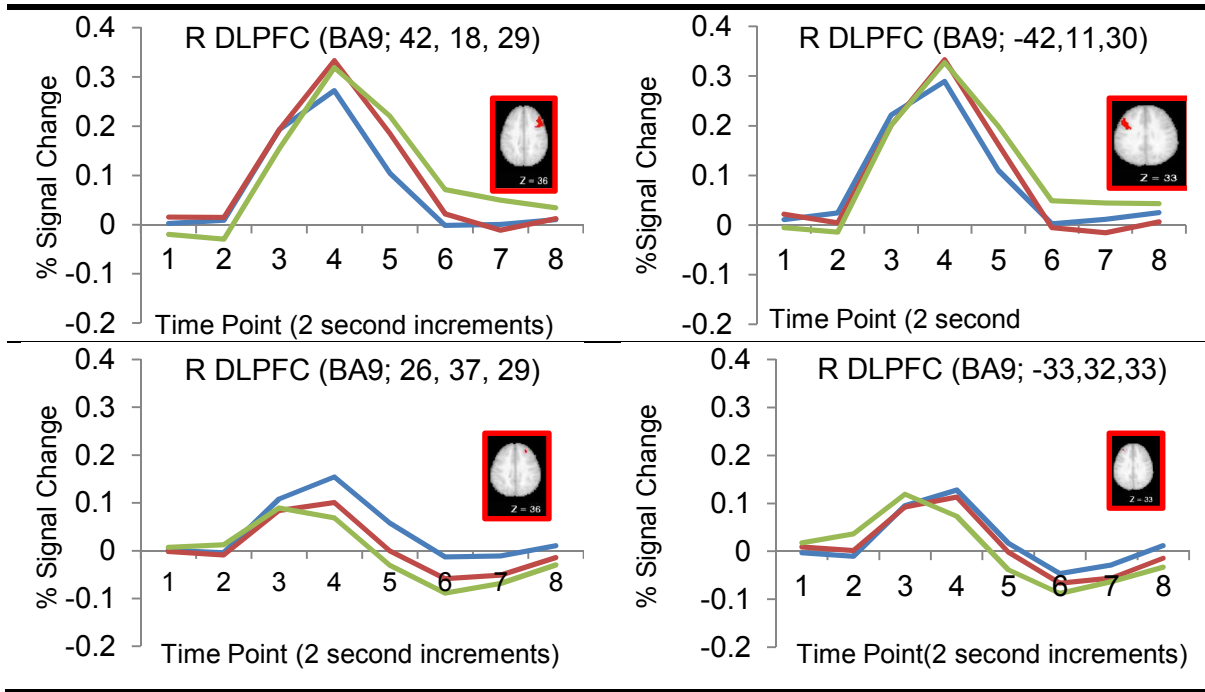

Supplementary Table 1.

| Analysis <sup>a</sup> | BA | Region of Activation   | Cluster size<br>(voxels) | Talairach<br>Coordinates |    |    |
|-----------------------|----|------------------------|--------------------------|--------------------------|----|----|
|                       |    |                        |                          | x                        | y  | z  |
| DLPFC                 | 46 | Middle frontal gyrus   | 11                       | 45                       | 31 | 22 |
|                       | 9  | Middle frontal gyrus   | 36                       | 36                       | 24 | 32 |
|                       | 9  | Precentral gyrus       | 68                       | 40                       | 8  | 31 |
|                       | 9  | Inferior frontal gyrus | 33                       | -40                      | 8  | 30 |
| Basal Ganglia         |    | Putamen                | 53                       | 24                       | 6  | 5  |
|                       |    | Putamen                | 19                       | -23                      | 7  | 5  |
|                       |    | Putamen                | 19                       | -19                      | 3  | 17 |

## Supplementary Note

Supplementary Fig 1.

- A. Basal Ganglia Anatomical ROI Mask
- B. Dorsolateral Prefrontal Cortex Anatomical ROI Mask

*Note.*

A. The BG mask was generated based on data set from Wang et al. (2008), which combines the Caudate, Nucleus Accumbus, Putamen, and the globus pallidus together.

B. The DLPFC mask (Brodmann's areas 9 and 46) included both left and right middle and superior frontal gyri according to anatomical landmarks (Rajkowska & Goldman-Rakic, 1995). To be specific, *"area 9 is located on the dorsal, lateral, and dorsomedial surfaces of the frontal lobe extending along the middle third of the superior frontal gyrus and adjacent portions of the middle frontal gyrus"*

*"Area 46 lies on the dorsolateral convexity and is either partially or completely surrounded by area 9. The superior border of area 46 with adjacent cortex is also variable within the middle and superior frontal sulci, as is the inferior border within the upper wall of the inferior frontal sulcus"* (page 323 from Rajkowska & Goldman-Rakic, 1995).

Supplementary Fig 2.

Time courses of each region in the DLPFC showing effects of reward context in the target phase.

## Supplementary Table 1.

### Regions displaying both sustained and transient effects

*Note.* These regions are from overlay map created to test whether there was any regions displaying both sustained context-dependent and transient cue-related effects in each DLPFC and basal ganglia mask ROIs.

<sup>a</sup> Each DLPFC and basal ganglia overlay maps were created by combining activation map displaying significant sustained context effect and another one showing significant transient reward cue x time point interaction in each DLPFC and basal ganglia, separately.
